## Appendix

*The SENZA-RCT Investigators and Participating Centers:* Center for Clinical Research and Carolina's Pain Institute at Brookstown, Wake Forest Baptist Health, Winston-Salem, North Carolina (Leonardo Kapural, M.D., Ph.D.; Christopher A. Gilmore, M.D.; James E. North, M.D.; Richard Rauck, M.D.); Swedish Pain and Headache Center, Seattle, Washington (Cong Yu, M.D.; Thomas Yang, M.D.); The Pain Center of Arizona, Phoenix, Arizona (Matthew W. Doust, M.D.; Abram H. Burgher, M.D.; Todd W. Turley, M.D.); Millennium Pain Center, Bloomington, Illinois (Ricardo Vallejo, M.D., Ph.D.; Ramsin Benyamin, M.D.); Advanced Pain Therapy, PLLC, Hattiesburg, Mississippi (B. Todd Sitzman, M.D., M.P.H.); IPM Medical Group, Inc., Walnut Creek, California (Kasra

Amirdelfan, M.D.); Pain Consultants of Oregon, Eugene, Oregon (Donna M. Morgan, M.D.; Joseph Dunn, M.D.; Peter S. Kosek, M.D.); Coastal Orthopedics and Sports Medicine, Bradenton, Florida (Lora L. Brown, M.D.; Richard Bundschu, M.D.; Gennady Gekht, M.D.); Comprehensive Pain and Rehabilitation, Pascagoula, Mississippi (Thomas L. Yearwood, M.D., Ph.D.; Matthew Barfield, M.D.; Hunt T. Hapworth, M.D.); Houston Pain Associates, Houston, Texas (Allen W. Burton, M.D.). *Data and Safety Monitoring Board:* Allen Wyler, M.D. (Chair); Sunil Panchal, M.D.; Bruce C. Stouch, Ph.D.; and James C. Watson, M.D. *Additional Contributor:* Richard G. Holcomb, Ph.D. (Independent Biostatistician) contributed substantially to the conception and design of this trial and to the analysis and interpretation of data.

## ANESTHESIOLOGY REFLECTIONS FROM THE WOOD LIBRARY-MUSEUM

### Dame Cicely Courtneidge's 1931 "Laughing Gas" Recording

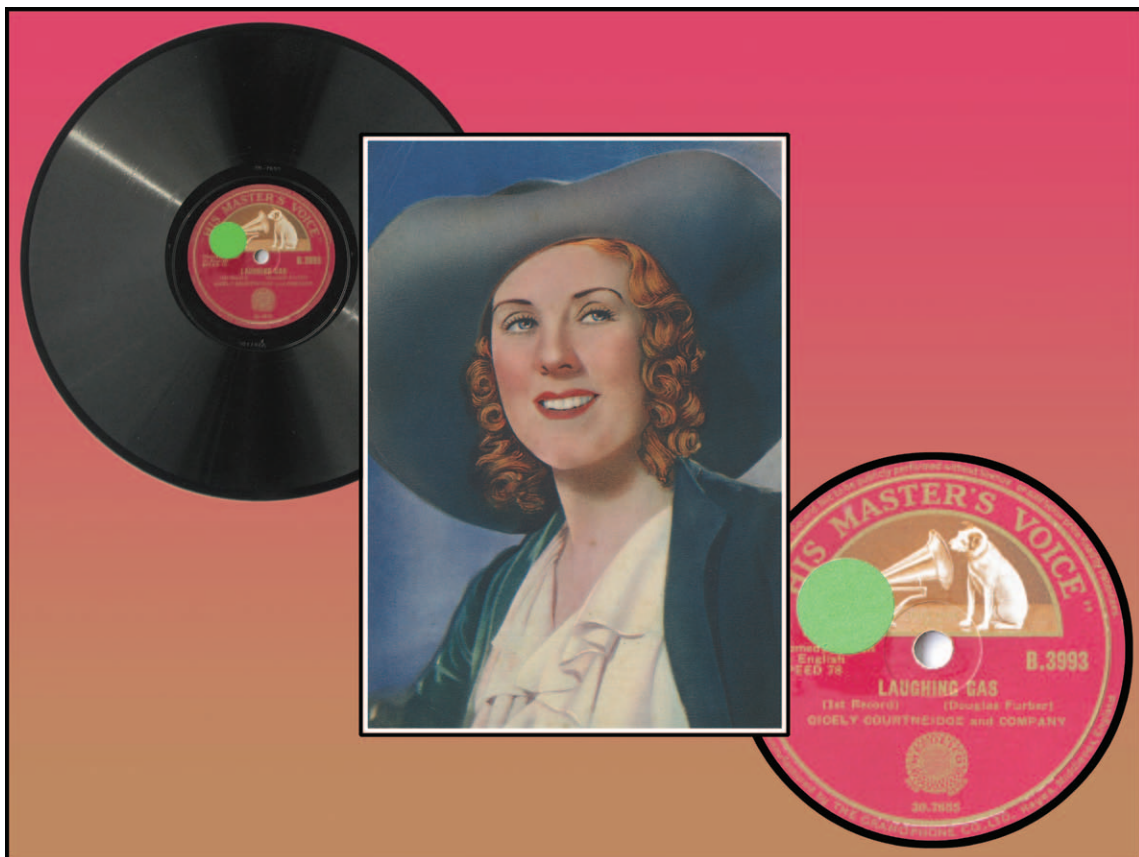

Born in Sydney, Australia, Dame Cicely Courtneidge (1893–1980, center) became a British star of stage, screen, and recording studios. In 1931 for H.M.V. ("His Master's Voice"), she recorded her classic sketch *Laughing Gas*. In that routine, young Ramona, the daughter of the late James Endicott Dowlick, fiddles with her uncle's nitrous oxide apparatus. Eventually, laughing gas fills the room and complicates the reading of Mr. Dowlick's last will and testament. To their own giggles and then howls of laughter, Dowlick's disappointed survivors learn that he bequeathed merely a fifth of the promised sum to his "dear friend Ernest Mitchum," only "best wishes" to his solicitor, and solely "income tax demands" exceeding £2,000 to his "dear wife Agatha." Regarding the laughing gas, the butler observed, "They gives you a whiff of that and you don't feel any more agony until you comes to." (Copyright © the American Society of Anesthesiologists, Inc.)

George S. Bause, M.D., M.P.H., Honorary Curator, ASA's Wood Library-Museum of Anesthesiology, Schaumburg, Illinois, and Clinical Associate Professor, Case Western Reserve University, Cleveland, Ohio. UJYC@aol.com.
